# Supplementary material for: Clinical and genomic characterization of hypervirulent Klebsiella pneumoniae (hvKp) infections via passive surveillance in Southern California, 2020–2022
Source: PubMed Central journal article supplement (PMC9614223; doi:10.3389/fmicb.2022.1001169), 2022-10-14
Supplement: Image_1.pdf [file Image_1.pdf]

**Figure S1.** SNP analysis comparing K2-66 isolates, two from our study and four from previously reported strains (30,31,34,35). The variant tracks were generated using the K2 reference strain, Kp52.145 (GenBank accession FO834906). **A.** Phylogenetic tree. **B.** SNP matrix.

A.

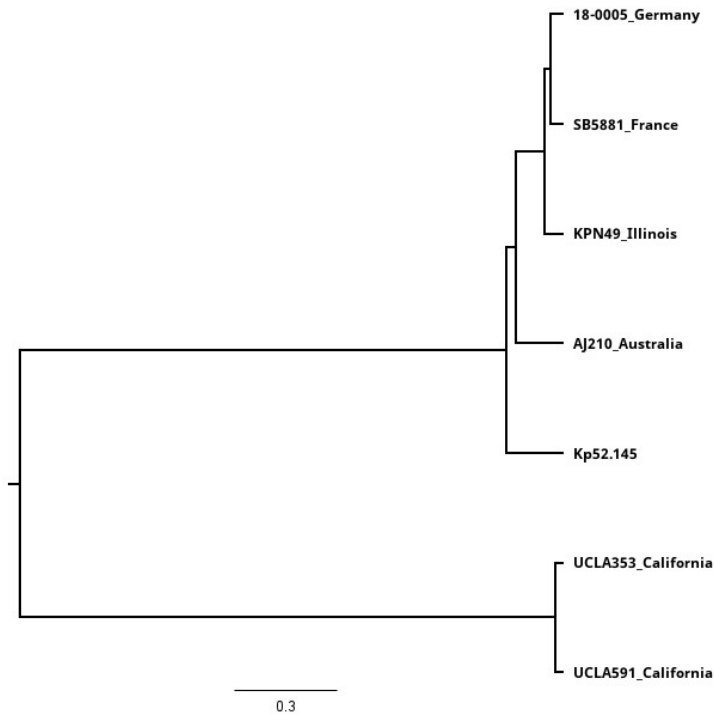

B.

|                    | 18-0005_G... | AJ210_Aust... | KPN49_Illin... | Kp52.145 | SB5881_Fr... | UCLA353_C... | UCLA591_C... |
|--------------------|--------------|---------------|----------------|----------|--------------|--------------|--------------|
| 18-0005_Germany    |              | 280           | 117            | 279      | 93           | 803          | 798          |
| AJ210_Australia    | 280          |               | 323            | 451      | 286          | 973          | 968          |
| KPN49_Illinois     | 117          | 323           |                | 318      | 136          | 840          | 833          |
| Kp52.145           | 279          | 451           | 318            |          | 298          | 756          | 753          |
| SB5881_France      | 93           | 286           | 136            | 298      |              | 818          | 813          |
| UCLA353_California | 803          | 973           | 840            | 756      | 818          |              | 59           |
| UCLA591_California | 798          | 968           | 833            | 753      | 813          | 59           |              |
