# Supplementary material for: Clinical and genomic characterization of hypervirulent Klebsiella pneumoniae (hvKp) infections via passive surveillance in Southern California, 2020–2022
Source: PubMed Central journal article supplement (PMC9614223; doi:10.3389/fmicb.2022.1001169), 2022-10-14
Supplement: Image_2.pdf [file Image_2.pdf]

**Figure S2.** SNP analysis of global reference hvKp isolates using NTUH-K2044 (GenBank accession AP006725) as the reference genome.

|        | 1  | 2   | 3   | 4   | 5   | 6   | 7   | 8   | 9   | 10  | 11  | 12  | 13  | 14  | 15  | 16  | 17  | 18  | 19  | 20  |     |
|--------|----|-----|-----|-----|-----|-----|-----|-----|-----|-----|-----|-----|-----|-----|-----|-----|-----|-----|-----|-----|-----|
| CAS685 | 1  | 0   | 187 | 166 | 321 | 186 | 205 | 168 | 236 | 214 | 203 | 188 | 213 | 287 | 343 | 150 | 188 | 191 | 201 | 163 | 174 |
| CAS687 | 2  | 187 | 0   | 194 | 332 | 199 | 216 | 181 | 251 | 229 | 214 | 205 | 226 | 298 | 354 | 177 | 201 | 204 | 209 | 170 | 181 |
| CAS690 | 3  | 166 | 194 | 0   | 328 | 193 | 212 | 175 | 243 | 221 | 210 | 195 | 221 | 293 | 350 | 157 | 195 | 198 | 205 | 170 | 181 |
| CAS692 | 4  | 321 | 332 | 328 | 0   | 333 | 348 | 315 | 385 | 363 | 346 | 339 | 360 | 318 | 374 | 311 | 335 | 338 | 347 | 308 | 319 |
| CAS694 | 5  | 186 | 199 | 193 | 333 | 0   | 217 | 180 | 252 | 230 | 215 | 204 | 227 | 299 | 355 | 176 | 200 | 203 | 214 | 175 | 186 |
| CAS695 | 6  | 205 | 216 | 212 | 348 | 217 | 0   | 199 | 269 | 247 | 224 | 221 | 244 | 314 | 370 | 195 | 219 | 222 | 229 | 192 | 203 |
| CAS698 | 7  | 168 | 181 | 175 | 315 | 180 | 199 | 0   | 234 | 212 | 197 | 186 | 209 | 281 | 337 | 158 | 182 | 185 | 196 | 155 | 168 |
| CAS699 | 8  | 236 | 251 | 243 | 385 | 252 | 269 | 234 | 0   | 150 | 267 | 258 | 237 | 351 | 407 | 228 | 254 | 257 | 265 | 227 | 238 |
| CAS701 | 9  | 214 | 229 | 221 | 363 | 230 | 247 | 212 | 150 | 0   | 245 | 236 | 215 | 329 | 385 | 206 | 232 | 235 | 243 | 205 | 216 |
| CAS726 | 10 | 203 | 214 | 210 | 346 | 215 | 224 | 197 | 267 | 245 | 0   | 221 | 242 | 312 | 368 | 193 | 217 | 220 | 229 | 190 | 201 |
| CAS727 | 11 | 188 | 205 | 195 | 339 | 204 | 221 | 186 | 258 | 236 | 221 | 0   | 233 | 305 | 361 | 178 | 206 | 209 | 220 | 181 | 192 |
| CAS813 | 12 | 213 | 226 | 221 | 360 | 227 | 244 | 209 | 237 | 215 | 242 | 233 | 0   | 326 | 382 | 205 | 229 | 232 | 238 | 202 | 213 |
| CAS905 | 13 | 287 | 298 | 293 | 318 | 299 | 314 | 281 | 351 | 329 | 312 | 305 | 326 | 0   | 338 | 277 | 301 | 304 | 313 | 272 | 285 |
| CAS906 | 14 | 343 | 354 | 350 | 374 | 355 | 370 | 337 | 407 | 385 | 368 | 361 | 382 | 338 | 0   | 331 | 357 | 360 | 369 | 330 | 341 |
| CAS983 | 15 | 150 | 177 | 157 | 311 | 176 | 195 | 158 | 228 | 206 | 193 | 178 | 205 | 277 | 331 | 0   | 178 | 181 | 192 | 153 | 164 |
| CAS986 | 16 | 188 | 201 | 195 | 335 | 200 | 219 | 182 | 254 | 232 | 217 | 206 | 229 | 301 | 357 | 178 | 0   | 55  | 216 | 173 | 188 |
| CAS988 | 17 | 191 | 204 | 198 | 338 | 203 | 222 | 185 | 257 | 235 | 220 | 209 | 232 | 304 | 360 | 181 | 55  | 0   | 219 | 180 | 191 |
| CAS990 | 18 | 201 | 209 | 205 | 347 | 214 | 229 | 196 | 265 | 243 | 229 | 220 | 238 | 313 | 369 | 192 | 216 | 219 | 0   | 139 | 150 |
| CAS991 | 19 | 163 | 170 | 170 | 308 | 175 | 192 | 155 | 227 | 205 | 190 | 181 | 202 | 272 | 330 | 153 | 173 | 180 | 139 | 0   | 111 |
| CAS992 | 20 | 174 | 181 | 181 | 319 | 186 | 203 | 168 | 238 | 216 | 201 | 192 | 213 | 285 | 341 | 164 | 188 | 191 | 150 | 111 | 0   |
